# Supplementary material
Source: PubMed Central journal article supplement (PMC4247586)
Supplement: supp_tpc.114.130948_tpc130948_Supplemental.pdf [file supp_tpc.114.130948_tpc130948_Supplemental.pdf]

|      |        |                |                 |                |                |
|------|--------|----------------|-----------------|----------------|----------------|
| FC 1 | Lane 1 | B73-1-S-AR001  | Mo17-1-S-AR003  | BxM-1-S-AR008  | MxB-1-S-AR009  |
|      | Lane 2 | B73-1-MZ-AR001 | Mo17-1-MZ-AR003 | BxM-1-MZ-AR008 | MxB-1-MZ-AR009 |
|      | Lane 3 | B73-1-C-AR001  | Mo17-1-C-AR003  | BxM-1-C-AR008  | MxB-1-C-AR009  |
|      | Lane 4 | B73-1-EZ-AR001 | Mo17-1-EZ-AR003 | BxM-1-EZ-AR008 | MxB-1-EZ-AR009 |
|      | Lane 5 | B73-2-S-AR009  | Mo17-2-S-AR001  | BxM-2-S-AR003  | MxB-2-S-AR008  |
|      | Lane 6 | B73-2-EZ-AR009 | Mo17-2-EZ-AR001 | BxM-2-EZ-AR003 | MxB-2-EZ-AR008 |
|      | Lane 7 | B73-2-C-AR009  | Mo17-2-C-AR001  | BxM-2-C-AR003  | MxB-2-C-AR008  |
|      | Lane 8 | B73-2-MZ-AR009 | Mo17-2-MZ-AR001 | BxM-2-MZ-AR003 | MxB-2-MZ-AR008 |
| FC 2 | Lane 1 | B73-3-C-AR008  | Mo17-3-C-AR009  | BxM-3-C-AR001  | MxB-3-C-AR003  |
|      | Lane 2 | B73-3-EZ-AR008 | Mo17-3-EZ-AR009 | BxM-3-EZ-AR001 | MxB-3-EZ-AR003 |
|      | Lane 3 | B73-3-S-AR008  | Mo17-3-S-AR009  | BxM-3-S-AR001  | MxB-3-S-AR003  |
|      | Lane 4 | B73-3-MZ-AR008 | Mo17-3-MZ-AR009 | BxM-3-MZ-AR001 | MxB-3-MZ-AR003 |
|      | Lane 5 | B73-4-C-AR003  | Mo17-4-C-AR008  | BxM-4-C-AR009  | MxB-4-C-AR001  |
|      | Lane 6 | B73-4-MZ-AR003 | Mo17-4-MZ-AR008 | BxM-4-MZ-AR009 | MxB-4-MZ-AR001 |
|      | Lane 7 | B73-4-S-AR003  | Mo17-4-S-AR008  | BxM-4-S-AR009  | MxB-4-S-AR001  |
|      | Lane 8 | B73-4-EZ-AR003 | Mo17-4-EZ-AR008 | BxM-4-EZ-AR009 | MxB-4-EZ-AR001 |

Figure S1 Distribution of 64 samples across 16 lanes on two flow cells (FC) for RNA-seq. Per lane four samples with different barcodes were pooled. Barcodes: AR001, AR003, AR008, AR009; BxM: B73xMo17, MxB: Mo17xB73; S: stele, C: cortex, MZ: meristematic zone, EZ: elongation zone.

**Table S1:** Sequencing output (in 100 bp reads) of the 64 primary root tissue samples.

| <b>FC1</b>   |     |                   | GENOTYPE                             |                                     |                                     |                                     |                                    | TOTAL              |
|--------------|-----|-------------------|--------------------------------------|-------------------------------------|-------------------------------------|-------------------------------------|------------------------------------|--------------------|
|              |     |                   | B73                                  | Mo17                                | B73 x Mo17                          | Mo17 x B73                          | UNKNOWN                            |                    |
| Lane         | Rep | Zone              | AR001<br>(ATCAGC)                    | AR003<br>(TTAGGC)                   | AR008<br>(ACTTGA)                   | AR009<br>(GATCAG)                   | OTHER                              | TOTAL              |
| 1            | 1   | Stele (S)         | 23,920,572<br>(45.1%)                | 8,840,168<br>(16.7%)                | 6,875,917<br>(13.0%)                | 7,072,858<br>(13.3%)                | 6,290,586<br>(11.9%)               | 53,000,101         |
| 2            | 1   | Cortex (C)        | 20,316,965<br>(38.4%)                | 14,031,056<br>(26.5%)               | 7,063,766<br>(13.4%)                | 6,557,514<br>(12.4%)                | 4,914,880<br>(9.3%)                | 52,884,181         |
| 3            | 1   | Meristematic (MZ) | 21,656,211<br>(39.3%)                | 11,965,981<br>(21.7%)               | 8,211,436<br>(14.9%)                | 7,692,558<br>(13.9%)                | 5,635,154<br>(10.2%)               | 55,161,340         |
| 4            | 1   | Elongation (EZ)   | 22,407,708<br>(39.8%)                | 14,511,782<br>(25.8%)               | 5,167,060<br>(9.2%)                 | 7,640,345<br>(13.6%)                | 6,556,154<br>(11.6%)               | 56,283,049         |
| 5            | 2   | Stele (S)         | 9,065,418<br>(21.6%)                 | 9,099,375<br>(21.7%)                | 10,048,544<br>(24.0%)               | 10,568,360<br>(25.2%)               | 3,096,723<br>(7.4%)                | 41,878,420         |
| 6            | 2   | Cortex (C)        | 8,035,938<br>(17.7%)                 | 10,418,576<br>(23.0%)               | 12,912,672<br>(28.5%)               | 10,241,287<br>(22.6%)               | 3,727,355<br>(8.2%)                | 45,335,828         |
| 7            | 2   | Meristematic (MZ) | 10,603,238<br>(23.4%)                | 8,915,713<br>(19.7%)                | 11,233,768<br>(24.8%)               | 10,729,362<br>(23.7%)               | 3,765,481<br>(8.3%)                | 45,247,562         |
| 8            | 2   | Elongation (EZ)   | 10,153,096<br>(23.4%)                | 8,690,910<br>(20.0%)                | 10,680,402<br>(24.6%)               | 10,137,329<br>(23.4%)               | 3,711,650<br>(8.6%)                | 43,373,387         |
| <b>TOTAL</b> |     |                   | <b>126,159,146</b><br><b>(32.1%)</b> | <b>86,473,561</b><br><b>(22.0%)</b> | <b>72,193,565</b><br><b>(18.4%)</b> | <b>70,639,613</b><br><b>(18.0%)</b> | <b>37,697,983</b><br><b>(9.6%)</b> | <b>393,163,868</b> |

| <b>FC2</b>   |     |                   | GENOTYPE                            |                                     |                                     |                                     |                                    | TOTAL              |
|--------------|-----|-------------------|-------------------------------------|-------------------------------------|-------------------------------------|-------------------------------------|------------------------------------|--------------------|
|              |     |                   | B73                                 | Mo17                                | B73 x Mo17                          | Mo17 x B73                          | UNKNOWN                            |                    |
| Lane         | Rep | Zone              | AR001<br>(ATCAGC)                   | AR003<br>(TTAGGC)                   | AR008<br>(ACTTGA)                   | AR009<br>(GATCAG)                   | OTHER                              | TOTAL              |
| 1            | 3   | Stele (S)         | 8,315,490<br>(20.2%)                | 12,387,951<br>(30.0%)               | 7,550,133<br>(18.3%)                | 10,581,893<br>(25.6%)               | 2,423,775<br>(5.9%)                | 41,259,242         |
| 2            | 3   | Cortex (C)        | 9,140,452<br>(20.1%)                | 10,004,144<br>(22.0%)               | 15,408,287<br>(33.9%)               | 8,180,020<br>(18.0%)                | 2,735,805<br>(6.0%)                | 45,468,708         |
| 3            | 3   | Meristematic (MZ) | 10,758,794<br>(25.7%)               | 9,485,218<br>(22.7%)                | 9,884,147<br>(23.7%)                | 9,333,688<br>(22.3%)                | 2,329,274<br>(5.6%)                | 41,791,121         |
| 4            | 3   | Elongation (EZ)   | 9,521,326<br>(21.2%)                | 9,830,516<br>(21.8%)                | 8,242,965<br>(18.3%)                | 14,722,587<br>(32.7%)               | 2,690,450<br>(6.0%)                | 45,007,844         |
| 5            | 4   | Stele (S)         | 10,991,014<br>(24.9%)               | 9,898,573<br>(22.4%)                | 8,765,011<br>(19.9%)                | 11,720,198<br>(26.6%)               | 2,737,049<br>(6.2%)                | 44,111,845         |
| 6            | 4   | Cortex (C)        | 10,860,880<br>(23.5%)               | 9,498,061<br>(20.5%)                | 13,318,940<br>(28.8%)               | 9,660,963<br>(20.9%)                | 2,885,105<br>(6.2%)                | 46,223,949         |
| 7            | 4   | Meristematic (MZ) | 11,085,115<br>(26.1%)               | 10,266,232<br>(24.2%)               | 9,873,982<br>(23.2%)                | 8,718,446<br>(20.5%)                | 2,557,891<br>(6.0%)                | 42,501,666         |
| 8            | 4   | Elongation (EZ)   | 9,251,277<br>(21.1%)                | 6,093,690<br>(13.9%)                | 12,642,411<br>(28.9%)               | 10,544,453<br>(24.1%)               | 5,248,825<br>(12.0%)               | 43,780,656         |
| <b>TOTAL</b> |     |                   | <b>79,924,348</b><br><b>(22.8%)</b> | <b>77,464,385</b><br><b>(22.1%)</b> | <b>85,685,876</b><br><b>(24.5%)</b> | <b>83,462,248</b><br><b>(23.8%)</b> | <b>23,608,174</b><br><b>(6.7%)</b> | <b>350,145,031</b> |

**Table S2:** Sequencing output after trimming the reads, mapping them to the maize genomic sequence, removal of redundant reads and determination of reads in the gene space of maize.

| Sample          | No. Trimmed Reads | No. Aligned Reads (Redundant) | No. Uniquely Aligned Reads | No. Uniquely Aligned Reads in Gene Space |
|-----------------|-------------------|-------------------------------|----------------------------|------------------------------------------|
| B73-1-C-AR001   | 16,388,609        | 14,660,038 (89.5%)            | 13,648,174 (83.3%)         | 13,172,135 (96.5%)                       |
| B73-1-EZ-AR001  | 16,745,702        | 14,945,249 (89.2%)            | 13,810,778 (82.5%)         | 13,326,146 (96.5%)                       |
| B73-1-MZ-AR001  | 15,953,658        | 14,267,806 (89.4%)            | 12,923,444 (81.0%)         | 12,428,656 (96.2%)                       |
| B73-1-S-AR001   | 18,533,970        | 16,579,429 (89.5%)            | 15,327,648 (82.7%)         | 14,612,166 (95.3%)                       |
| B73-2-C-AR001   | 8,971,265         | 7,687,217 (85.7%)             | 7,115,103 (79.3%)          | 6,853,468 (96.3%)                        |
| B73-2-EZ-AR001  | 8,567,784         | 7,457,058 (87.0%)             | 6,848,279 (79.9%)          | 6,549,631 (95.6%)                        |
| B73-2-MZ-AR001  | 6,788,030         | 5,854,237 (86.2%)             | 5,347,541 (78.8%)          | 5,153,477 (96.4%)                        |
| B73-2-S-AR001   | 7,789,674         | 6,739,969 (86.5%)             | 6,200,219 (79.6%)          | 5,936,525 (95.7%)                        |
| B73-3-C-AR001   | 9,133,436         | 7,837,472 (85.8%)             | 7,248,302 (79.4%)          | 6,966,514 (96.1%)                        |
| B73-3-EZ-AR001  | 7,970,490         | 6,793,932 (85.2%)             | 6,123,962 (76.8%)          | 5,898,174 (96.3%)                        |
| B73-3-MZ-AR001  | 7,718,082         | 6,869,088 (89.0%)             | 5,574,145 (72.2%)          | 5,344,462 (95.9%)                        |
| B73-3-S-AR001   | 7,124,552         | 6,195,990 (87.0%)             | 5,731,598 (80.4%)          | 5,573,883 (97.2%)                        |
| B73-4-C-AR001   | 9,452,161         | 8,397,345 (88.8%)             | 7,710,314 (81.6%)          | 7,389,321 (95.8%)                        |
| B73-4-EZ-AR001  | 7,347,712         | 6,515,131 (88.7%)             | 5,768,250 (78.5%)          | 5,539,124 (96.0%)                        |
| B73-4-MZ-AR001  | 9,185,126         | 8,167,311 (88.9%)             | 7,523,015 (81.9%)          | 7,195,804 (95.7%)                        |
| B73-4-S-AR001   | 9,324,170         | 8,218,245 (88.1%)             | 7,627,840 (81.8%)          | 7,339,173 (96.2%)                        |
| Mo17-1-C-AR003  | 9,527,953         | 8,117,089 (85.2%)             | 7,461,079 (78.3%)          | 7,146,163 (95.8%)                        |
| Mo17-1-EZ-AR003 | 11,325,634        | 9,765,747 (86.2%)             | 8,900,423 (78.6%)          | 8,560,901 (96.2%)                        |
| Mo17-1-MZ-AR003 | 11,483,966        | 9,864,430 (85.9%)             | 9,006,760 (78.4%)          | 8,629,510 (95.8%)                        |
| Mo17-1-S-AR003  | 7,240,407         | 6,148,179 (84.9%)             | 5,659,255 (78.2%)          | 5,425,456 (95.9%)                        |
| Mo17-2-C-AR003  | 7,620,202         | 6,665,799 (87.5%)             | 6,118,610 (80.3%)          | 5,941,321 (97.1%)                        |
| Mo17-2-EZ-AR003 | 7,332,628         | 6,331,011 (86.3%)             | 5,663,282 (77.2%)          | 5,441,267 (96.1%)                        |
| Mo17-2-MZ-AR003 | 8,799,697         | 7,674,902 (87.2%)             | 6,967,846 (79.2%)          | 6,710,005 (96.3%)                        |
| Mo17-2-S-AR003  | 7,698,343         | 6,593,702 (85.7%)             | 5,988,859 (77.8%)          | 5,779,719 (96.5%)                        |
| Mo17-3-C-AR003  | 8,275,646         | 7,116,739 (86.0%)             | 6,215,090 (75.1%)          | 6,001,696 (96.6%)                        |
| Mo17-3-EZ-AR003 | 8,356,235         | 7,258,688 (86.9%)             | 6,640,673 (79.5%)          | 6,378,837 (96.1%)                        |
| Mo17-3-MZ-AR003 | 8,514,501         | 7,402,438 (86.9%)             | 6,790,960 (79.8%)          | 6,548,750 (96.4%)                        |
| Mo17-3-S-AR003  | 10,766,860        | 9,321,876 (86.6%)             | 8,660,103 (80.4%)          | 8,395,955 (96.9%)                        |
| Mo17-4-C-AR003  | 8,852,880         | 8,029,115 (90.7%)             | 7,432,293 (84.0%)          | 7,181,400 (96.6%)                        |
| Mo17-4-EZ-AR003 | 4,977,253         | 4,547,423 (91.4%)             | 4,200,946 (84.4%)          | 4,056,254 (96.6%)                        |
| Mo17-4-MZ-AR003 | 8,196,806         | 7,554,971 (92.2%)             | 6,894,680 (84.1%)          | 6,626,402 (96.1%)                        |
| Mo17-4-S-AR003  | 8,509,987         | 7,815,929 (91.8%)             | 5,935,722 (69.8%)          | 5,748,829 (96.9%)                        |
| BxM-1-C-AR008   | 6,504,048         | 5,681,521 (87.4%)             | 5,281,049 (81.2%)          | 5,112,251 (96.8%)                        |

|                   |                    |                            |                            |                            |
|-------------------|--------------------|----------------------------|----------------------------|----------------------------|
| BxM-1-EZ-AR008    | 4,067,273          | 3,613,093 (88.8%)          | 3,324,277 (81.7%)          | 3,195,789 (96.1%)          |
| BxM-1-MZ-AR008    | 5,656,774          | 4,910,466 (86.8%)          | 4,503,575 (79.6%)          | 4,329,550 (96.1%)          |
| BxM-1-S-AR008     | 5,609,122          | 4,920,258 (87.7%)          | 4,559,098 (81.3%)          | 4,376,685 (96.0%)          |
| BxM-2-C-AR008     | 9,278,666          | 7,873,039 (84.9%)          | 7,221,124 (77.8%)          | 7,004,000 (97.0%)          |
| BxM-2-EZ-AR008    | 8,852,122          | 7,835,252 (88.5%)          | 7,094,031 (80.1%)          | 6,795,820 (95.8%)          |
| BxM-2-MZ-AR008    | 10,830,066         | 9,501,443 (87.7%)          | 8,599,988 (79.4%)          | 8,328,217 (96.8%)          |
| BxM-2-S-AR008     | 8,512,172          | 7,483,302 (87.9%)          | 6,859,233 (80.6%)          | 6,625,566 (96.6%)          |
| BxM-3-C-AR008     | 8,620,900          | 7,792,510 (90.4%)          | 6,954,354 (80.7%)          | 6,694,576 (96.3%)          |
| BxM-3-EZ-AR008    | 7,005,355          | 6,409,966 (91.5%)          | 5,845,448 (83.4%)          | 5,623,613 (96.2%)          |
| BxM-3-MZ-AR008    | 13,110,359         | 11,923,294 (90.9%)         | 11,005,503 (83.9%)         | 10,635,345 (96.6%)         |
| BxM-3-S-AR008     | 6,414,730          | 5,598,017 (87.3%)          | 5,194,061 (81.0%)          | 5,057,916 (97.4%)          |
| BxM-4-C-AR008     | 8,449,833          | 7,355,783 (87.1%)          | 6,768,095 (80.1%)          | 6,549,676 (96.8%)          |
| BxM-4-EZ-AR008    | 10,095,508         | 8,750,317 (86.7%)          | 7,914,440 (78.4%)          | 7,600,389 (96.0%)          |
| BxM-4-MZ-AR008    | 11,390,960         | 9,977,739 (87.6%)          | 9,039,596 (79.4%)          | 8,616,116 (95.3%)          |
| BxM-4-S-AR008     | 7,437,270          | 6,483,136 (87.2%)          | 5,475,652 (73.6%)          | 5,297,083 (96.7%)          |
| MxB-1-C-AR009     | 5,977,726          | 5,246,663 (87.8%)          | 4,858,811 (81.3%)          | 4,698,735 (96.7%)          |
| MxB-1-EZ-AR009    | 5,770,141          | 5,077,870 (88.0%)          | 4,660,052 (80.8%)          | 4,472,180 (96.0%)          |
| MxB-1-MZ-AR009    | 5,330,786          | 4,753,396 (89.2%)          | 4,370,514 (82.0%)          | 4,179,153 (95.6%)          |
| MxB-1-S-AR009     | 5,697,918          | 5,073,168 (89.0%)          | 4,278,989 (75.1%)          | 4,070,531 (95.1%)          |
| MxB-2-C-AR009     | 8,926,029          | 7,926,263 (88.8%)          | 7,434,847 (83.3%)          | 7,210,331 (97.0%)          |
| MxB-2-EZ-AR009    | 8,443,211          | 7,549,973 (89.4%)          | 7,013,662 (83.1%)          | 6,706,902 (95.6%)          |
| MxB-2-MZ-AR009    | 8,506,466          | 7,559,208 (88.9%)          | 7,027,568 (82.6%)          | 6,788,195 (96.6%)          |
| MxB-2-S-AR009     | 8,915,967          | 7,950,087 (89.2%)          | 7,378,992 (82.8%)          | 7,089,879 (96.1%)          |
| MxB-3-C-AR009     | 8,023,533          | 6,755,575 (84.2%)          | 6,108,247 (76.1%)          | 5,891,715 (96.5%)          |
| MxB-3-EZ-AR009    | 12,698,644         | 11,102,981 (87.4%)         | 10,061,320 (79.2%)         | 9,688,470 (96.3%)          |
| MxB-3-MZ-AR009    | 6,875,509          | 5,837,500 (84.9%)          | 5,297,848 (77.1%)          | 5,119,062 (96.6%)          |
| MxB-3-S-AR009     | 9,188,047          | 7,890,242 (85.9%)          | 7,278,022 (79.2%)          | 7,076,217 (97.2%)          |
| MxB-4-C-AR009     | 7,485,965          | 6,603,566 (88.2%)          | 6,121,101 (81.8%)          | 5,869,737 (95.9%)          |
| MxB-4-EZ-AR009    | 8,387,389          | 7,377,150 (88.0%)          | 6,759,778 (80.6%)          | 6,514,654 (96.4%)          |
| MxB-4-MZ-AR009    | 8,261,451          | 7,297,919 (88.3%)          | 6,710,921 (81.2%)          | 6,450,349 (96.1%)          |
| MxB-4-S-AR009     | 9,993,209          | 8,817,342 (88.2%)          | 7,694,526 (77.0%)          | 7,402,696 (96.2%)          |
| <b>B73 Total</b>  | <b>166,994,421</b> | <b>147,185,517 (88.1%)</b> | <b>134,528,612 (80.6%)</b> | <b>129,278,659 (96.1%)</b> |
| <b>Mo17 Total</b> | <b>137,478,998</b> | <b>120,208,038 (87.4%)</b> | <b>108,536,581 (78.9%)</b> | <b>104,572,465 (96.3%)</b> |
| <b>BxM Total</b>  | <b>131,835,158</b> | <b>116,109,136 (88.1%)</b> | <b>105,639,524 (80.1%)</b> | <b>101,842,592 (96.4%)</b> |
| <b>MxB Total</b>  | <b>128,481,991</b> | <b>112,818,903 (87.8%)</b> | <b>103,055,198 (80.2%)</b> | <b>99,228,806 (96.3%)</b>  |

**Table S3:** Gene Ids of SPE genes assigned to the GO term "apoptosis". The 'X' indicates in which tissue the considered gene showed single parent expression. For each of the four SPE-classes, the GO term apoptosis was significantly overrepresented ( $q$  value > 0.00068).

| SPE gene ID                 | GO term                                                             | SPE_MZ | SPE_EZ | SPE_C | SPE_S |
|-----------------------------|---------------------------------------------------------------------|--------|--------|-------|-------|
| GRMZM2G450496               | GO:0006952 defense response                                         | X      | X      |       | X     |
|                             | GO:0006915 apoptosis                                                |        |        |       |       |
|                             | GO:0005524 ATP binding                                              |        |        |       |       |
| GRMZM2G306727               | GO:0006952 defense response                                         |        |        |       | X     |
|                             | GO:0006915 apoptosis                                                |        |        |       |       |
|                             | GO:0005524 ATP binding                                              |        |        |       |       |
|                             | GO:0005515 protein binding                                          |        |        |       |       |
| GRMZM2G005134               | GO:0006952 defense response                                         | X      | X      | X     | X     |
|                             | GO:0006915 apoptosis                                                |        |        |       |       |
|                             | GO:0005524 ATP binding                                              |        |        |       |       |
|                             | GO:0005515 protein binding                                          |        |        |       |       |
| GRMZM2G013170               | GO:0006952 defense response                                         |        |        |       | X     |
|                             | GO:0006915 apoptosis                                                |        |        |       |       |
|                             | GO:0017111 nucleoside-triphosphatase activity                       |        |        |       |       |
|                             | GO:0005524 ATP binding                                              |        |        |       |       |
| GRMZM2G038388               | GO:0006952 defense response                                         | X      | X      | X     | X     |
|                             | GO:0007229 integrin-mediated signaling pathway                      |        |        |       |       |
|                             | GO:0006915 apoptosis                                                |        |        |       |       |
|                             | GO:0008305 integrin complex                                         |        |        |       |       |
|                             | GO:0007160 cell-matrix adhesion                                     |        |        |       |       |
|                             | GO:0023052 signaling                                                |        |        |       |       |
|                             | GO:0004872 receptor activity                                        |        |        |       |       |
|                             | GO:0023034 intracellular signaling pathway                          |        |        |       |       |
|                             | GO:0005524 ATP binding                                              |        |        |       |       |
|                             | GO:0023033 signaling pathway                                        |        |        |       |       |
| GRMZM5G837251               | GO:0006952 defense response                                         |        |        |       | X     |
|                             | GO:0006915 apoptosis                                                |        |        |       |       |
|                             | GO:0017111 nucleoside-triphosphatase activity                       |        |        |       |       |
|                             | GO:0005524 ATP binding                                              |        |        |       |       |
| GRMZM2G083258               | GO:0006952 defense response                                         |        |        | X     | X     |
|                             | GO:0006915 apoptosis                                                |        |        |       |       |
|                             | GO:0005524 ATP binding                                              |        |        |       |       |
| GRMZM2G110894               | GO:0006915 apoptosis                                                |        |        | X     |       |
|                             | GO:0005515 protein binding                                          |        |        |       |       |
| GRMZM2G141256               | GO:0006633 fatty acid biosynthetic process                          |        | X      |       |       |
|                             | GO:0006915 apoptosis                                                |        |        |       |       |
|                             | GO:0015935 small ribosomal subunit                                  |        |        |       |       |
|                             | GO:0048871 multicellular organismal homeostasis                     |        |        |       |       |
|                             | GO:0009239 enterobactin biosynthetic process                        |        |        |       |       |
|                             | GO:0051287 NAD or NADH binding                                      |        |        |       |       |
|                             | GO:0050826 response to freezing                                     |        |        |       |       |
|                             | GO:0008667 2,3-dihydro-2,3-dihydroxybenzoate dehydrogenase activity |        |        |       |       |
|                             | GO:0004022 alcohol dehydrogenase (NAD) activity                     |        |        |       |       |
|                             | GO:0004316 3-oxoacyl-[acyl-carrier-protein] reductase activity      |        |        |       |       |
|                             | GO:0044281 small molecule metabolic process                         |        |        |       |       |
|                             | GO:0042309 homiothermy                                              |        |        |       |       |
|                             | GO:0044283 small molecule biosynthetic process                      |        |        |       |       |
|                             | GO:0050825 ice binding                                              |        |        |       |       |
|                             | GO:0055114 oxidation reduction                                      |        |        |       |       |
|                             | GO:0005761 mitochondrial ribosome                                   |        |        |       |       |
| GO:0006952 defense response |                                                                     |        |        |       |       |

|                  |                                               |   |   |   |   |
|------------------|-----------------------------------------------|---|---|---|---|
| AC152495.1_FG017 | GO:0006915 apoptosis                          |   | X |   | X |
|                  | GO:0005524 ATP binding                        |   |   |   |   |
| GRMZM2G403407    | GO:0043234 protein complex                    |   |   |   |   |
|                  | GO:0051258 protein polymerization             |   |   |   |   |
|                  | GO:0006915 apoptosis                          |   |   |   | X |
|                  | GO:0003924 GTPase activity                    |   |   |   |   |
|                  | GO:0005524 ATP binding                        |   |   |   |   |
| GRMZM2G410975    | GO:0005525 GTP binding                        |   |   |   |   |
|                  | GO:0006915 apoptosis                          |   |   | X |   |
| GRMZM2G302279    | GO:0005515 protein binding                    |   |   |   |   |
|                  | GO:0006952 defense response                   |   |   |   |   |
|                  | GO:0006915 apoptosis                          |   |   |   | X |
| GRMZM2G064015    | GO:0017111 nucleoside-triphosphatase activity |   |   |   |   |
|                  | GO:0005524 ATP binding                        |   |   |   |   |
|                  | GO:0006952 defense response                   | X |   |   |   |
| GRMZM2G382273    | GO:0006915 apoptosis                          | X | X | X | X |
|                  | GO:0005524 ATP binding                        |   |   |   |   |
|                  | GO:0006952 defense response                   |   |   |   |   |
|                  | GO:0005515 protein binding                    |   |   |   |   |
| GRMZM5G880361    | GO:0006915 apoptosis                          |   |   |   | X |
|                  | GO:0017111 nucleoside-triphosphatase activity |   |   |   |   |
|                  | GO:0005524 ATP binding                        |   |   |   |   |
|                  | GO:0006952 defense response                   |   |   |   |   |
| GRMZM5G898898    | GO:0006915 apoptosis                          | X | X |   |   |
|                  | GO:0017111 nucleoside-triphosphatase activity |   |   |   |   |
|                  | GO:0005524 ATP binding                        |   |   |   |   |
|                  | GO:0005515 protein binding                    |   |   |   |   |
| GRMZM5G819919    | GO:0006952 defense response                   | X | X | X | X |
|                  | GO:0006915 apoptosis                          |   |   |   |   |
|                  | GO:0017111 nucleoside-triphosphatase activity |   |   |   |   |
|                  | GO:0005524 ATP binding                        |   |   |   |   |
| GRMZM2G061742    | GO:0006952 defense response                   |   |   | X |   |
|                  | GO:0006915 apoptosis                          |   |   |   |   |
|                  | GO:0005524 ATP binding                        |   |   |   |   |
| GRMZM2G136513    | GO:0006952 defense response                   |   |   |   |   |
|                  | GO:0006915 apoptosis                          |   |   |   |   |
|                  | GO:0017111 nucleoside-triphosphatase activity |   |   | X |   |
|                  | GO:0005524 ATP binding                        |   |   |   |   |
|                  | GO:0005515 protein binding                    |   |   |   |   |
| GRMZM2G097135    | GO:0006915 apoptosis                          |   | X |   |   |
|                  | GO:0005515 protein binding                    |   |   |   |   |
| GRMZM2G452954    | GO:0006952 defense response                   | X | X | X | X |
|                  | GO:0006915 apoptosis                          |   |   |   |   |
|                  | GO:0005524 ATP binding                        |   |   |   |   |
| GRMZM2G069382    | GO:0003676 nucleic acid binding               |   |   |   |   |
|                  | GO:0006915 apoptosis                          |   |   |   |   |
|                  | GO:0006952 defense response                   |   |   | X | X |
|                  | GO:0008270 zinc ion binding                   |   |   |   |   |
|                  | GO:0005515 protein binding                    |   |   |   |   |
| GRMZM2G396357    | GO:0005524 ATP binding                        |   |   |   |   |
|                  | GO:0006952 defense response                   | X | X | X | X |
|                  | GO:0006915 apoptosis                          |   |   |   |   |
|                  | GO:0017111 nucleoside-triphosphatase activity |   |   |   |   |
| GRMZM2G000376    | GO:0005524 ATP binding                        |   |   |   |   |
|                  | GO:0016021 integral to membrane               |   | X | X |   |
|                  | GO:0008219 cell death                         |   |   |   |   |

|               |                                                        |   |   |   |   |
|---------------|--------------------------------------------------------|---|---|---|---|
| GRMZM2G065692 | GO:0005634 nucleus                                     |   |   |   |   |
|               | GO:0006915 apoptosis                                   |   |   |   |   |
|               | GO:0006952 defense response                            |   | X | X |   |
|               | GO:0006355 regulation of transcription, DNA-dependent  |   |   |   |   |
|               | GO:0034645 cellular macromolecule biosynthetic process |   |   |   |   |
| GRMZM2G030051 | GO:0005524 ATP binding                                 |   |   |   |   |
|               | GO:0006952 defense response                            |   |   |   |   |
|               | GO:0006915 apoptosis                                   | X |   | X |   |
|               | GO:0017111 nucleoside-triphosphatase activity          |   |   |   |   |
| GRMZM2G397785 | GO:0005524 ATP binding                                 |   |   |   |   |
|               | GO:0006952 defense response                            |   |   |   |   |
|               | GO:0006915 apoptosis                                   | X | X | X | X |
|               | GO:0017111 nucleoside-triphosphatase activity          |   |   |   |   |
| GRMZM2G074496 | GO:0005524 ATP binding                                 |   |   |   |   |
|               | GO:0006952 defense response                            |   |   |   |   |
|               | GO:0006915 apoptosis                                   |   |   |   | X |
